# Supplementary material for: Combined application of biochar and nitrogen fertilizer improves rice yield, microbial activity and N-metabolism in a pot experiment
Source: PeerJ. 2020 Nov 13;8:e10311. doi: 10.7717/peerj.10311 (PMC7668215; doi:10.7717/peerj.10311)
Supplement: Supplemental Information 2 [file peerj-08-10311-s002.xlsx]

## Sheet: Sheet1
				early	early	early	early	late	late	late	late	early	early	early	late	late	late	early	early	early	late	late	late	early	early	early	Late	late	late
	R	B	N	Aca	BRPa	MRPa	Protien	Acb	BRPb	WRPb	Protien	DMtilla	DMheada	DMmata	DMtillb	DMheadb	DMmatb	Nutilla	Nutillb	Nuheada	Nuheadb	Numata	Numatb	Chlaa	Chlab	Chlac	Chlba	chlbb	Chlbc
	1	1	1	22.3	79.11	69.25	6.31474	23	79.1	79.1	7.23282	21.37	25.29	38.19	15.05	26.52	35.52	0.28	0.27	0.34744	0.41744	0.44	0.459	31.5	37.74	33.2	33.5	37.74	34.2
	1	2	1	23.5	79.75	69.825	7.75969	26.5	80.27	80.275	7.56424	23.55	33.12	46.11	15.23	38.35	45.35	0.29	0.28	0.54028	0.59028	0.69	0.73	41.4	44.24	35.7	42.3	44.24	35.7
	1	3	1	25.9	79.6	70.375	7.81027	27.9	79.45	81.45	8.00335	18.63	37.74	44.55	16.65	38.97	45.97	0.49	0.55	0.493076	0.653076	0.76	0.73	38.9	44.04	37.6	38.9	44.04	40.6
	1	4	1	25.9	79.975	70.35	8.18214	27.5	80.15	80.475	7.08288	24.38	40.08	46.97	22.4	41.31	48.31	0.66	0.66	0.76	0.75	0.83	0.809	43.1	46.74	41.2	43.1	48.74	42.2
	1	1	2	23.5	78.8	68.25	7.40507	26.5	78.3	79.3	6.85886	24.885	35.39	42.28	22.905	36.62	43.62	0.41	0.3	0.53	0.63	0.515	0.594	37.28	40.64	35.2	37.28	40.64	39.2
	1	2	2	24.3	79.3	69.7	8.34071	27.3	79.8	79.8	8.04648	25.3875	38.12	46.01	23.4075	39.35	46.35	0.51	0.57	0.77	0.71	0.7	0.67	39.19	42.14	38.6	39.59	42.14	38.6
	1	3	2	26.6	80	71.25	8.42788	28.3	80.5	80.5	7.67729	25.39	37.94	48.83	21.41	39.17	48.17	0.65	0.63	0.81	0.74	0.84	0.81	41.2	47.9	39.3	41.2	47.5	42.3
	1	4	2	26.9	78.55	70.35	7.8418	28.2	79.925	79.025	7.97449	24.1	38.08	47.92	22.32	39.31	49.31	0.65	0.64	0.746	0.716	0.87	0.849	43.11	43.6	39.5	43.11	46.9	39.9
	2	1	1	22.4	77.4	68.4	6.59617	21.4	78.4	78.4	7.2953	21.67	23.35	33.34	20.35	24.58	34.58	0.24	0.29	0.38	0.52	0.435	0.414	35.3	35.24	34.7	35.3	39.24	34.7
	2	2	1	22.8	78.9	71.2	6.93919	25.8	79.4	79.4	7.81652	22.805	33.34	49.33	21.485	38.57	46.57	0.27	0.34	0.49	0.53	0.705	0.694	42.08	43.94	33.7	42.08	44.94	37.7
	2	3	1	26.8	79.95	69.2	8.53557	28.8	80.1	80.1	7.91975	21.115	36.5	48.31	19.135	39.73	47.73	0.58	0.54	0.51	0.51	0.81	0.78	40.17	44.14	37.2	43.17	44.14	37.2
	2	4	1	25.8	79	68.1	7.56215	27.9	79.7	79.5	7.72964	23.98	45.36	48.25	22	40.59	49.59	0.61	0.65	0.75	0.84	0.84	0.819	42.4	46.74	42.2	42.4	46.74	42.2
	2	1	2	23.2	78.4	66.8	7.61749	26.2	76.9	78.9	6.86808	25.205	36.42	43.31	23.225	37.65	44.65	0.51	0.49	0.68	0.58	0.53	0.509	38.2	40.3	37.6	38.2	41.3	37.6
	2	2	2	24.5	79.1	68.2	7.82604	27.5	79.6	79.6	7.30273	24.78	37.44	47.33	22.8	38.67	48.67	0.54	0.59	0.75	0.85	0.715	0.694	41.1	45.74	35.7	41.5	45.74	35.7
	2	3	2	26.9	79.3	70	7.97865	27.8	79.8	79.8	8.00394	23.13	38.9	48.79	21.15	40.13	49.13	0.61	0.63	0.765	0.725	0.83	0.8	43.3	45.74	38.1	45.3	46.74	38.1
	2	4	2	26.8	79.8	68	7.89535	28.1	80.3	80.3	7.73143	23.845	40.36	49.65	21.865	41.59	48.59	0.61	0.63	0.805	0.7605	0.84	0.819	39.1	48.24	38.5	41.1	48.24	39.8
	3	1	1	22.4	78.3	69.375	6.45545	21.4	78.5	78.5	7.56156	17.75	26.3	39.29	16.43	27.53	36.53	0.26	0.26	0.39	0.53	0.425	0.404	33.18	38.44	33.9	33.18	38.44	33.9
	3	2	1	23.8	79	70.35	7.34944	26.8	79.5	79.5	7.69038	20.12	36.37	45.16	18.8	37.6	46.6	0.28	0.29	0.56	0.49	0.68	0.679	39.8	42.74	37.3	39.8	42.74	37.3
	3	3	1	26.4	80.2	71.75	8.32167	27.4	79.7	79.7	7.96155	20.88	39.41	48.26	18.9	40.64	46.64	0.55	0.55	0.61	0.61	0.79	0.76	44.11	43.14	38.11	44.11	45.14	38.11
	3	4	1	26.4	78.7	70.7	7.87215	28.6	80.3	79.2	7.73351	25.41	36.98	46.241	19.43	38.21	47.581	0.62	0.64	0.78	0.74	0.86	0.82	41.2	47.04	40.5	42.2	47.04	42.5
	3	1	2	23.4	77.8	68.625	7.51128	26.4	77.3	78.3	6.86347	19.39	34.4	44.29	17.41	35.63	45.63	0.46	0.32	0.58	0.68	0.48	0.659	39.97	41.3	36.3	39.97	41.3	36.3
	3	2	2	24.8	79	68.8	7.96437	27.8	79.5	79.5	7.67461	24.105	36.47	47.36	22.125	37.7	47.7	0.59	0.49	0.643945	0.643945	0.7	0.679	40.335	42.04	38.5	40.335	42.04	41.5
	3	3	2	26.7	79.4	69.4	8.61977	27.8	79.9	79.9	7.84061	23.9	40.01	47.9	21.92	41.24	49.24	0.64	0.64	0.76	0.74	0.86	0.83	41.99	47.87	43.5	41.99	47.87	43.5
	3	4	2	26.4	76.9	70	8.55283	28.2	81.4	77.4	8.02209	25.945	39.251	49.14	21.965	40.481	50.481	0.63	0.65	0.78	0.73	0.82	0.799	44.18	46.84	38.5	44.18	46.84	40.5

## Sheet: Sheet3
					MBNA	MBNb	MBCa	MBcb	Chlaa	Chlab	Acb	BRPb	WRPb	Protien	MBcb
					25	21	211.1	174	31.5	37.74	23	79.1	79.1	7.23282	174
					26	22	312.5	275	41.4	44.24	26.5	80.27	80.275	7.56424	275
					27	27	414.9	377	38.9	44.04	27.9	79.45	81.45	8.00335	377
					40	36	437	400	43.1	46.74	27.5	80.15	80.475	7.08288	400
					26	22	298	261	37.28	40.64	26.5	78.3	79.3	6.85886	261
					35	31	351	314	39.19	42.14	27.3	79.8	79.8	8.04648	314
					40	36	428	391	41.2	47.9	28.3	80.5	80.5	7.67729	391
					60	56	425.9	388	43.11	43.6	28.2	79.925	79.025	7.97449	388
					24	20	240.42	203	35.3	35.24	21.4	78.4	78.4	7.2953	203
					23	19	321.8	284	42.08	43.94	25.8	79.4	79.4	7.81652	284
					38	34	385.8	348	40.17	44.14	28.8	80.1	80.1	7.91975	348
					43	39	405	358	42.4	46.74	27.9	79.7	79.5	7.72964	358
					31	27	380.5	343	38.2	40.3	26.2	76.9	78.9	6.86808	343
					39	35	321	284	41.1	45.74	27.5	79.6	79.6	7.30273	284
					41	37	389	352	43.3	45.74	27.8	79.8	79.8	8.00394	352
					45	41	428	391	39.1	48.24	28.1	80.3	80.3	7.73143	391
					30	26	230.37	193	33.18	38.44	21.4	78.5	78.5	7.56156	193
					34	26	282.8	245	39.8	42.74	26.8	79.5	79.5	7.69038	245
					27	23	375.4	338	44.11	43.14	27.4	79.7	79.7	7.96155	338
					51	47	412	378	41.2	47.04	28.6	80.3	79.2	7.73351	378
					27	23	380.8	343	39.97	41.3	26.4	77.3	78.3	6.86347	343
					27	23	318	281	40.335	42.04	27.8	79.5	79.5	7.67461	281
					55	51	421	384	41.99	47.87	27.8	79.9	79.9	7.84061	384
					54	50	391	354	44.18	46.84	28.2	81.4	77.4	8.02209	354
